# Supplementary material for: Hierarchical ZSM-5 nanosheets for production of light olefins and aromatics by catalytic cracking of oleic acid
Source: Royal Society of Chemistry journal article supplement (doi:10.1039/d4se01167h), 2024-11-12
Supplement: d4se01167h1.pdf [file d4se01167h1.pdf]

## Supporting Information

# Hierarchical ZSM-5 nanosheets for production of light olefins and aromatics by catalytic cracking of oleic acid

Haoyu Liu <sup>a</sup>, Wenbo Luo <sup>a</sup>, Ke Wang <sup>a</sup>, Yanlin Wang <sup>a</sup>, Hong Yuan <sup>a,b,c\*</sup>

<sup>a</sup> School of Chemistry and Chemical Engineering, North Minzu University, Yinchuan 750021, China

<sup>b</sup> Key Laboratory for Chemical Engineering and Technology, State Ethnic Affairs Commission, North Minzu University, Yinchuan 750021, China

<sup>c</sup> Ningxia Key Laboratory of Solar Chemical Conversion Technology, North Minzu University, Yinchuan 750021, China

### Experimental

#### Preparation of Conventional ZSM-5

A conventional ZSM-5 specimen was produced according to the method of Wu et al <sup>1</sup>. Briefly, 13.1 g of TPAOH and 20 g of water were combined and stirred at 35 °C for 0.5 h, after which 0.4 g AIP and 0.1 g NaOH were added successively followed by further stirring until all reagents were completely dissolved. Following this, 20.5 g of TEOS was slowly added to the mixture with subsequent stirring for 16 h to obtain a gel having the molar ratios 50 SiO<sub>2</sub>:0.5 Al<sub>2</sub>O<sub>3</sub>:13 NaOH:8.5 TPAOH. This gel was transferred to a hydrothermal reactor and held at 180 °C for 48 h. After centrifugation and washing, the solid product was dried at 100 °C for 10 h and calcined at 550 °C for 6 h to obtain the ZSM-5 zeolite. This material is referred to herein as CZSM-5.

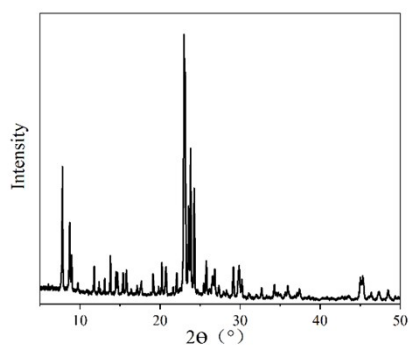

**Fig. S1** The low-angle XRD pattern of the CZSM-5.

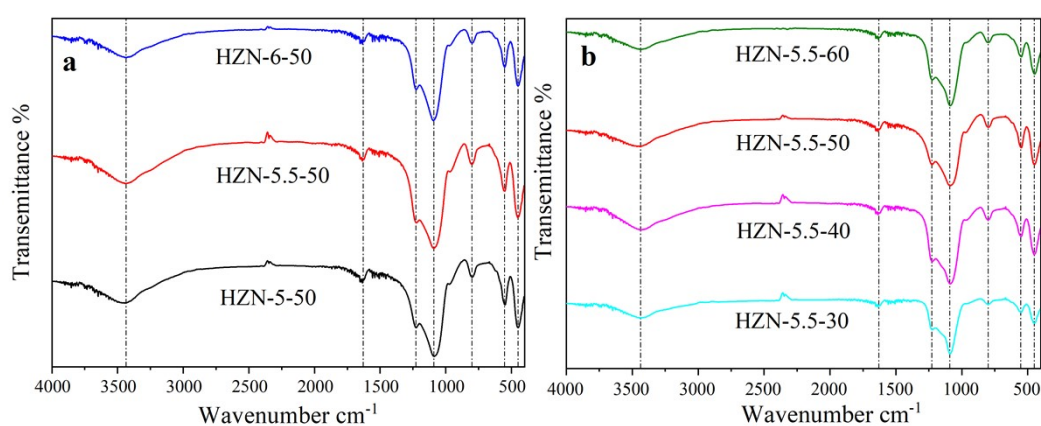

**Fig. S2** FTIR spectra of (a) HZN-X-50 and (b) HZN-5.5-X.

The FTIR spectra were obtained from the HZN specimens to further confirm the formation of a ZSM-5 crystal phase. As shown in **Fig. S2a and b**, each material generated peaks characteristic of a highly siliceous MFI structure. The peaks at 450 and 553  $\text{cm}^{-1}$  are assigned to the bending vibrations of  $\text{TO}_4$  units ( $\text{T} = \text{Si}, \text{Al}$ ) and the asymmetric stretching mode of five-membered pentasile rings, respectively.<sup>2</sup> These peaks would not be obtained from amorphous materials. The peak at 1228  $\text{cm}^{-1}$  is attributed to the external asymmetric stretching mode involving T-O-T linkages between  $\text{TO}_4$  tetrahedra and is typical of a highly siliceous MFI structure. The peaks at 1091 and 800  $\text{cm}^{-1}$  are assigned to the internal asymmetric and external symmetric

stretching modes of T-O-T linkages, respectively.<sup>3</sup> The peak at  $3436\text{ cm}^{-1}$  corresponds to the Al-OH framework (meaning the Brønsted acid sites) in an MFI-type framework.<sup>4</sup>

The bending vibration of water molecules observed at  $1630\text{ cm}^{-1}$  is ascribed to the absorption of moisture.<sup>5</sup> As shown in Fig. S2a, the FTIR spectra negligibly changed with different HZN  $\text{Na}^+$  contents, as the exchange of  $\text{Na}^+$  ions for  $-\text{OH}$  group protons is difficult because of the larger hydration radius of the former; therefore, HNZ possesses a low ion exchange capacity, which negligibly impacted the MFI structure.<sup>6</sup>

Thus, both the XRD and FTIR results confirmed that the synthesized HZN zeolite had a typical MFI structure.

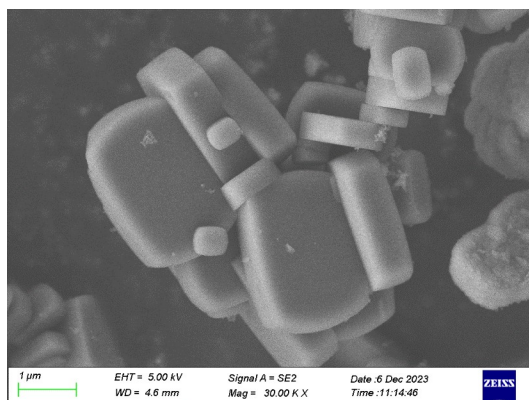

**Fig. S3** The SEM images of CZSM-5 samples.

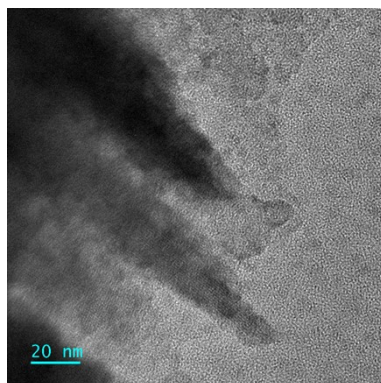

**Fig. S4** The TEM images of uncalcined HZN-5.5-50 series samples.

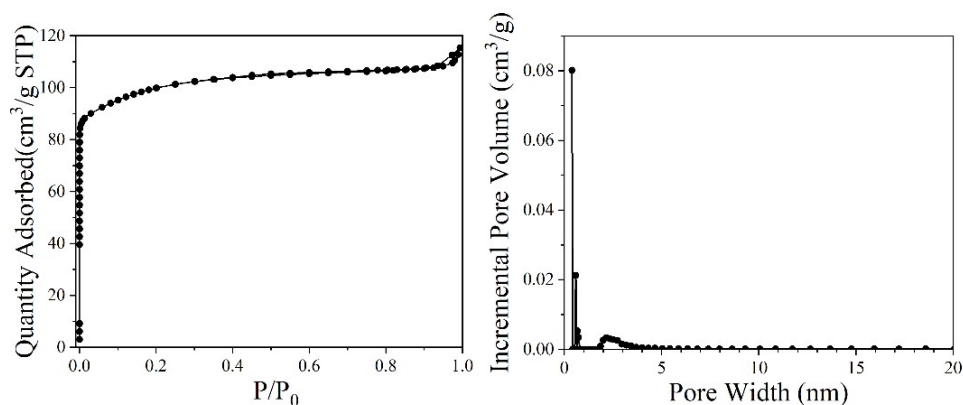

**Fig. S5** Adsorption-desorption curves and pore size distributions of CZSM-5.

**Table S1** The lattice parameters of HZN-X-X

| Samples    | a (nm) | b (nm) | c (nm) | V <sub>cell</sub> (nm <sup>3</sup> ) |
|------------|--------|--------|--------|--------------------------------------|
| HZN-5-50   | 2.033  | 1.997  | 1.356  | 5.505                                |
| HZN-5.5-50 | 2.047  | 1.991  | 1.366  | 5.567                                |
| HZN-6-50   | 2.044  | 1.994  | 1.370  | 5.584                                |
| HZN-5.5-30 | 2.035  | 2.001  | 1.358  | 5.530                                |
| HZN-5.5-40 | 2.026  | 1.997  | 1.365  | 5.523                                |
| HZN-5.5-60 | 2.012  | 1.998  | 1.350  | 5.427                                |

## References

- [1] H. Wu, A. Duan, Z. Zhao, T. Li, R. Prins, X. Zhou, *J. Catal.* 2014, 317, 303–317.
- [2] Radhika, N. P., Selvin, R., Kakkar, R., & Roselin, L. S. *Journal of Nanoscience and Nanotechnology*, 2018, 18, 5404–5413.
- [3] Ji, Y., Yang, H., & Yan, W. *Fuel*, 2019, 243, 155–161.
- [4] C. Altındaş, F. Sher, N. Smječanin, E. C. Lima, T. Rashid, I. U. Hai, A. Karaduman, *Environ. Res.* 2023, 216, 114479.
- [5] S. Narayanan, J. J. Vijaya, S. Sivasanker, S. Yang, L. J. Kennedy, *Chinese J. Catal.* 2014, 35, 1892–1899.
- [6] Ji, Y., Yang, H., & Yan, W. *Fuel*, 2019, 243, 155–161.
